# 1 Investigating the Causal Link Between Serum Iron Status and Pernicious 2 Anaemia Risk: A Mendelian Randomisation Study

3

4 Guillermo Comesaña Cimadevila<sup>1\*</sup>, Alfie Thain<sup>1\*</sup>, Marie-Joe Dib<sup>2</sup> & Kouros R Ahmadi<sup>1§</sup>

5

6 <sup>1</sup> School of Biosciences and Medicine, University of Surrey, Guildford, UK.

7 <sup>2</sup> Division of Cardiovascular Medicine, Perelman School of Medicine, University of Pennsylvania,  
8 Philadelphia.

9

10 \* Contributed equally to the manuscript.

11 § Corresponding author: Kouros R Ahmadi, School of Biosciences and Medicine, University of  
12 Surrey, Guildford, UK. Email: [k.ahmadi@surrey.ac.uk](mailto:k.ahmadi@surrey.ac.uk).

13

14

15

16

17

18

19

20

21

22

23

24

25

26

27

28

NOTE: This preprint reports new research that has not been certified by peer review and should not be used to guide clinical practice.

29

## 30 **Abstract**

31 **Introduction:** Pernicious anaemia (PA) is characterised by vitamin B<sub>12</sub> deficiency due to  
32 autoimmune-mediated destruction of gastric parietal cells and the consequent loss of intrinsic factor.  
33 A considerable proportion of PA patients also exhibit iron deficiency (ID), both before or at (20.7-  
34 52%) and after (46.4%) PA diagnosis. However, findings from observational studies do not clarify  
35 whether ID contributes to PA risk or is a consequence of the PA disease process. Given the high  
36 prevalence of ID at PA diagnosis, we hypothesised that reduced iron status may play a causal role in  
37 PA risk.

38 **Methodology:** We conducted two-sample Mendelian Randomisation (MR) analyses to evaluate the  
39 causal effect between systemic iron status and PA risk. Genetic association data for iron status were  
40 sourced from the deCODE study. Additionally, PA-relevant associative data with the chosen SNPs  
41 were obtained from genome-wide-association-study (GWAS) summary statistics, primarily from R10  
42 *FinnGen* release and from the GWAS conducted by Laisk et al. (2021) for replication purposes.  
43 Participant data consisted of 3,694 cases of PA and 393,684 controls. Inverse-variance weighted  
44 analysis was the primary MR method, with sensitivity analyses including Egger, and weighted-  
45 median estimates, additionally to testing for horizontal pleiotropy and heterogeneity.

46 **Results:** Four SNPs were strongly associated with systemic iron status and were used as genetic  
47 instruments. We found that genetically predicted iron status was not significantly associated with PA  
48 risk (odds ratio per 1 standard deviation increase in serum iron: 1.13, 95% confidence interval 0.80-  
49 1.58,  $P=0.49$ ). Sensitivity analyses had consistent results, indicating that MR assumptions were not  
50 violated and highlighting a null result subjectivity due to the presence of horizontal pleiotropy and  
51 heterogeneity.

52 **Conclusion:** This is the first MR study investigating the potential causal relationship between iron  
53 status and PA risk. Our results show that genetically predicted iron status is not associated with a  
54 significantly increased PA risk among individuals of European ancestry. Further research is needed  
55 to understand the manifestation of ID in PA.

56

## 57 **Introduction**

58 Pernicious anaemia (PA) is a complex and life-long condition that develops during the end stages of  
59 autoimmune atrophic gastritis (AAG) (1). The disease is characterised by vitamin B<sub>12</sub> (B<sub>12</sub>) deficiency  
60 derived from B<sub>12</sub> malabsorption as a consequence of gastric atrophy leading to reduced or absent  
61 intrinsic factor production (2). The prevalence of PA is often quoted at 0.1% among the general  
62 population, rising to 1.9% among individuals aged sixty or over. However, due to frequent mis or  
63 underdiagnosis, the true prevalence is likely to be notably higher (3). The presentation of PA is most  
64 commonly with neurological and cognitive symptoms but can also present in up to 20% of patients  
65 with gastrointestinal and haematological symptoms (4). This gastrointestinal symptomology  
66 originates from an autoimmune-mediated attack on parietal cells (PCs) promoting an atrophic gastric  
67 environment (1). A hallmark of PA and AAG is the presence of parietal cell autoantibodies (PCAs)  
68 targeting the H<sup>+</sup>/K<sup>+</sup> ATPase proton pump (5,6). These autoantibodies have been linked to gastric  
69 achlorhydria, resulting in compromised hydrochloric acid production. Despite advances in  
70 understanding many aspects of the disease, the aetiology of PA remains largely unknown. Given its  
71 multifactorial nature, both genetic predispositions and environmental triggers have been proposed to  
72 contribute to the onset, progression, and severity of PA (7).

73 Iron deficiency (ID) is the most prevalent nutrient deficiency worldwide; affecting over 1 billion  
74 people, and more predominantly observed among the female population (8). Causes of ID are diverse  
75 but commonly results from inadequate dietary intake, blood loss, or impaired duodenal absorption,  
76 which if long-term and untreated, can progress to iron deficiency anaemia (IDA) (9). Among PA  
77 patients, ID is observed both before and after PA diagnosis, with previous studies finding ID in 20.7–  
78 52% prior to or at the time of PA diagnosis, and 22.3–46.4% after diagnosis (10–12). Other studies  
79 have noted that 52% of patients with autoimmune gastritis and 17-29% of patients with PA presented  
80 with ID, though the timeline of ID development relative to PA diagnosis was not specified (13,14).  
81 Additionally, one study reported that ID developed in 41% of PA patients at some stage following the  
82 first year of vitamin B<sub>12</sub> treatment (15). Among PA patients with ID, there is heterogenic presentation

83 of anaemia, with individuals presenting with microcytic, normocytic, or macrocytic anaemia, in  
84 contrast to the common perception that PA patients only present with macrocytic megaloblastic  
85 anaemia (13,16). This heterogeneity has direct implications for the clinical management of PA,  
86 particularly in cases concurrent with ID. Currently, no routine screening or management protocols for  
87 ID in PA exist, despite the high prevalence of ID in this patient group. There is little doubt that absence  
88 of such protocols have led to sub-optimal management of PA patients and avoidable consequences in  
89 terms of symptom improvement and quality of life (17,18).

90 A number of observational studies have investigated the physiological link between ID and PA (see  
91 **Supplementary material, Figure 1**). Results from these studies have been equivocal with no clear  
92 answer as to whether ID leads to an increased susceptibility to PA or if PA onset and/or  
93 commencement of B12 therapy increases the risk of ID (10–12,18,19). Given that randomised  
94 controlled trials (RCTs) to confirm whether the link between iron and PA is causal or consequential  
95 is not available and difficult to implement given the ethical and logistical challenges, the question  
96 remains unanswered. This gap in research, alongside an incomplete understanding of the  
97 pathophysiological link between ID and PA, presents a significant challenge for effective patient  
98 management.

99 Given that there is not sufficient data or evidence to support whether increased susceptibility to PA  
100 or if PA onset and/or commencement of B12 therapy increases the risk of ID, we purport that an  
101 alternative approach would be to use a Mendelian randomisation (MR) framework. The MR approach  
102 is now routinely used genetic epidemiological tool that leverages data from genetic variants  
103 associated with modifiable risk factors or exposures – in this current study this would be iron status  
104 – as “instruments” to test and quantify a causal link with any outcome(s), which in our case is the risk  
105 of PA (20). The approach overcomes many of the limitations of traditional epidemiological tests. Most  
106 notably, by utilising genetic variants associated with iron status as instrumental variables, rather than  
107 simply utilising iron status, MR avoids traditional confounding between the exposure of interest  
108 (iron status) and the outcome (PA).

109 We set out to use a MR framework as a robust and simple test of whether genetically predicted  
110 reductions in systemic iron status result in an increased risk of PA (20).

## 111 **Methods**

### 112 *Study Design*

113 A flowchart outlining the design (**Figure 1**) and the MR-specific framework (**Figure 2**) is provided  
114 for clarity. We conducted a two-sample MR analysis to test for a causal effect between iron status and  
115 risk of PA. Three key assumptions pertaining to the selection of genetic instruments were required to  
116 ensure methodological validity and to ensure the robustness of MR analyses (20). These were:

117 (1) Independence: The genetic instruments for iron status should not be associated with risk of PA  
118 through external measured or unmeasured factors;

119 (2) Relevance: A sufficiently robust statistical association is required between the genetic instruments  
120 used and iron status;

121 (3) Exclusion Restriction: The variants used as instruments cannot be related to PA, through external  
122 risk factors other than the exposure of interest, namely iron status.

### 123 *Genetic Instrument Selection and Data Sources*

124 Systemic iron status was assessed as the modifiable exposure. Various biomarkers are available for  
125 measuring intrinsic iron levels, including serum iron, transferrin saturation ratio, serum ferritin, or  
126 total iron binding capacity. To ensure robustness, the selected instrumental variants were ensured to  
127 be robustly associated with all four biomarkers, with an adjusted  $P < 5.0 \times 10^{-08}$  threshold for  
128 statistical significance. Instrumental data was extracted from the Bell et al. (21) meta-analysis  
129 (Iceland, UK, and Denmark), composed of 3 genome-wide association studies (GWAS). Four SNPs  
130 were selected: rs1800562G>A (chr:6, exon 4, p.26092913) and rs1799945C>G (chr:6, exon 2,  
131 p.26090951) in the hereditary haemochromatosis (*HFE*) gene, rs855791G>A (chr:22, exon 17,  
132 p.37066896) in the transmembrane serine protease 6 (*TMPRSS6*) and rs57659670T>C (chr:15, exon  
133 17, p.45106240) within the dual oxidase 2 (*DUOX2*) (21). While the SNPs located within the  
134 *TMPRSS6* and *HFE* loci have previously been found to be robustly associated with systemic iron  
135 status, the *DUOX2* locus was suggested to present a novel statistical link with iron. Overall, since

136 multiple biomarkers would be appropriately eligible for the MR analysis, serum iron was the selected  
137 marker for iron level quantification in line with a previous publication by Hujoel et al. (22).

138 Given that the outcome of interest was PA, it was required to quantify its degree of association with  
139 the selected SNPs. Publicly available GWAS summary statistics from the R10 *FinnGen* release  
140 (<https://r10.finnngen.fi/>), corresponding to data from 500,000 individuals from the Finish Biobank was  
141 the chosen primary source. The relevant data for PA were extracted by performing a local phenotypic  
142 search for “vitamin B<sub>12</sub> deficiency anaemia”. The corresponding cohort comprised white individuals  
143 of Finnish descent, built by matching controls to the endpoint cases through variables including year  
144 of birth and sex. A total of 3,694 cases of B<sub>12</sub> deficiency anaemia, with a mean age of 62.07 years,  
145 (50.5% being females and 49.5% males) (23). The cases were identified using the ICD-10 code for  
146 PA (D51.0), while samples with different diagnostic codes were considered controls (n=393,694).

147 Associations between genetic instruments and PA were also tested for replication by utilising data  
148 from British, Estonian, and Finnish descent corresponding to the GWAS conducted by Laisk et al.  
149 (24). To ensure, the selected SNPs were not subject to instrumental weakness, *F*-statistic values of  
150 instrumental strength across each individual SNP were computed. A crucial requirement of an MR  
151 study is avoiding linkage disequilibrium (LD), between the selected SNPs and other loci, as this could  
152 introduce confounding (25). As such, LD was tested across both SNPs within the *HFE* gene, by using  
153 the LDLink tool considering all populations of European descent per 1000 genomes. To ensure that  
154 MR assumption 3 (exclusion restriction) was upheld, we examined the association between the  
155 selected SNPs with well-established risk factors for PA, namely sex and age. Finally, we performed  
156 a search into each of the selected SNPs within the R10 *FinnGen* release aiming to identify possible  
157 secondary phenotypes that might influence PA, that could potentially interfere with the causal effect  
158 estimate. Therefore, further reassuring the compliance to MR assumption 1 (independence  
159 assumption).

160

## 161 *Mendelian Randomisation Analysis*

162 All associations between each SNP and serum iron were combined into one arm, of which several  
163 statistical tests were conducted to examine the genetically predicted causal link between iron status  
164 and PA. The primary analytic technique was the inverse-variance weighted (IVW) meta-analysis,  
165 which combines associations between each SNP and serum iron status into a single estimate of the  
166 causal effect on PA (20). In addition, 2 sensitivity analyses were performed. First, a weighted median  
167 estimator (WME) was applied, which can provide accurate causal effect estimates even when 50% of  
168 the genetic instruments have invalid IVWs, hence minimising weak instrument bias (26). Finally, an  
169 MR-Egger regression was performed, to ensure result accuracy regardless of weak instrument bias  
170 by accounting for the presence of horizontal pleiotropy (27).

## 171 *Assessment of Heterogeneity and Horizontal Pleiotropy*

172 It was ensured that appropriate statistical parameters were computed to account for the influence of  
173 horizontal pleiotropy and heterogeneity (28). The MR Egger intercept was included in the regression  
174 analysis as a measure of pleiotropic bias between the selected genetic instruments. Furthermore,  
175 Cochran's Q statistic was used to assess heterogeneity between the combined effect of the selected  
176 genetic instruments on the IVW approach (29). Moreover, the  $I^2$  statistic was the selected statistical  
177 test for the identification and verification of heterogeneity within the Egger regression.

## 178 *Statistical Analysis*

179 All the analyses mentioned above were computed using RStudio (version 4.4.0). The primary package  
180 utilised consisted of the Two-Sample MR package (version 0.4.26) extracted from GitHub  
181 (<https://mrcieu.github.io/TwoSampleMR/>). Data outlining the association between the selected SNPs,  
182 serum iron status, and PA was displayed as betas and standard errors, with the respective effect allele  
183 frequencies independent of each SNP. The results displaying the associative link between iron status  
184 and PA were expressed as an odds ratio, with a 95% confidence interval and a significance value set  
185 at  $P < 0.05$ .



## 186 **Results**

187 Four SNPs strongly associated ( $P < 5.0 \times 10^{08}$ ) with systemic iron status, or serum iron were selected  
188 as instrumental variables, which include rs1799945, rs1800562 (*HFE*), rs855791 (*TMPRSS6*), and  
189 rs57659670 (*DUOX2*). Associations between the selected SNPs and all relevant iron biomarkers have  
190 been displayed in **Supplementary Tables 1 and 2**. *F* statistic values for all four instrumental  
191 variables ranged from 32.65 to 1371.74 (**Table 1**). Using the *FinnGen* data we found that the genetic  
192 instruments were not significantly associated with any known risk factors for PA (**Supplementary**  
193 **Table 4**). In addition, none of the selected SNPs were robustly associated with either sex or age  
194 (**Supplementary Table 5**).

195 The IVW analysis indicated that a 1 standard deviation increase in genetically predicted serum iron  
196 levels was associated with a 13.0% higher risk of PA (OR=1.13, CI=0.80-1.58,  $P=0.49$ ); however, the  
197 result was not statistically significant (**Table 2**). Sensitivity analyses using WME estimates supported  
198 the IVW findings, presenting a null statistical significance (OR=1.14, CI=0.88-1.48,  $P=0.32$ ).  
199 Similarly, MR Egger estimates were also not statistically significant (OR=1.04, CI=0.30-3.59,  
200  $P=0.95$ ). There was no evidence of directional, horizontal pleiotropic effect given that the Egger  
201 intercept did not differ from the null ( $P=0.91$ ). The combined heterogeneity of all the selected  
202 instruments measured with Cochran's Q-statistic indicated no directional pleiotropy or notable  
203 heterogenic effect within the main analysis (IVW) ( $Q=6.54$ ,  $P=0.051$ ). However, a moderate-high  
204 heterogenic effect was identified to impact the Egger regression ( $I^2=61.27\%$ ).

205 Replication MR using data from the GWAS data from Laisk et al. (24) revealed that per 1 standard  
206 deviation increase in genetically predicted serum iron status was associated with a non-significant  
207 lower PA risk in IVW analysis (OR=0.76, CI=0.52-1.12,  $P=0.16$ ) (**Table 3**). WME results were  
208 similarly non-significant (OR=0.73, CI=0.52-1.05,  $P=0.087$ ). Likewise, Egger estimates were also  
209 not statistically significant (OR=0.90, CI=0.24-3.47,  $P=0.89$ ). No horizontal pleiotropic effect  
210 appeared to impact our findings; given that the Egger intercept did not differ from zero ( $P=0.818$ ).

211 Integrated heterogeneity of all the selected instruments indicated no directional pleiotropy or notable  
212 heterogenic effect within the IVW analysis ( $Q=6.54$ ,  $P=0.088$ ). Conversely, a moderate heterogenic  
213 effect was identified to impact the Egger regression ( $I^2=54.12\%$ ).

## 214 **Discussion**

215 To our knowledge, this is the first study to directly test for a causal relationship between iron status  
216 and an increased risk of PA using an MR framework. As presented, if the MR assumptions hold, our  
217 study findings suggest no causal effect of genetically predicted systemic iron levels on PA risk. These  
218 findings align with the current consensus based on our understanding of the aetiology of AIG and PA  
219 disease process and the published literature that ID is more likely a manifestation of PA progression  
220 rather than an aetiological cause of PA (11,19).

### 221 *Does ID develop after commencement of vitamin B12 treatment among PA patients?*

222 As previously mentioned, ID is prevalent among PA patients before, at, or after diagnosis. However,  
223 when evaluating these studies, it is important to consider the timing of ID onset, given that ID can be  
224 masked by B<sub>12</sub> deficiency due to ineffective erythropoiesis and may become apparent only after the  
225 initiation of B<sub>12</sub> treatment (30,31). While a causal link between ID and PA has been proposed (32),  
226 no systematic studies have thoroughly investigated the physiological basis of the association. The  
227 primary argument supporting the causal hypothesis relates to the higher prevalence of ID before PA  
228 diagnosis (10,12). Nonetheless, the early onset of ID could be subject to a different explanation due  
229 to the faster depletion of iron stores with respect to vitamin B<sub>12</sub> (13,30). This will result in hepatic  
230 iron reserves being used to fulfil homeostatic demands, in light of a compromised intestinal uptake  
231 of non-haem iron due to a lack of gastric acidity as observed in AAG and PA. It is hypothesised that  
232 this manifestation would be observed before the characteristic loss of intrinsic factor and presentation  
233 of B<sub>12</sub> deficiency. This has been previously presented as a potential mechanistic route that would  
234 favour the idea of a consequential relationship between iron depletion and PA development (30). It is  
235 important consider the possibility of ID being as an early-onset sign of PA for patient screening,  
236 particularly considering the delayed (>2 years on average) diagnosis of PA pertaining to the initial  
237 manifestation of the diverse symptomology associated with PA (17,33).

238

239

240 *Mechanistic Pathway Linking Hypochlorhydria and Iron Deficiency*

241 The development of hypochloridria as a result of an autoimmune attack by PCAs has been proposed  
242 as a key mechanistic pathway leading to ID, followed by the development of PA (**Figure 1,**  
243 **supplementary material**).

244 In the healthy state, PCs produce both IF for B<sub>12</sub> absorption and H<sup>+</sup> via the H<sup>+</sup>/K<sup>+</sup> ATPase pump to  
245 form with chloride (Cl<sup>-</sup>) to produce HCl, maintaining a gastric pH < 3.0 (34). The gastric acidic  
246 environment provided by functional parietal cells supports iron absorption by enabling the  
247 ferrereductase enzyme Duodenal Cytochrome B (DCytB) to reduce ferric iron (Fe<sup>3+</sup>) into its  
248 absorbable ferrous form (Fe<sup>2+</sup>), which is then transported into enterocytes via divalent metal  
249 transporter 1 (DMT1) (35,36). Additionally, Haem iron (from animal sources) is dissociated from  
250 dietary proteins in the acidic stomach environment and absorbed via the haem transporter (HaemT)  
251 (37). Once ferrous iron is inside the enterocyte, it is either stored as ferritin or exported into circulation  
252 as Fe<sup>2+</sup> through ferroportin (FPN1), where it is oxidised back to Fe<sup>3+</sup> by hephaestin (HEPH) and  
253 bound to transferrin (Tf) for systemic distribution (38,39).

254 In a disease state, PCAs target the H<sup>+</sup>/K<sup>+</sup> ATPase, impairing H<sup>+</sup> and IF secretion. Over time, this  
255 results in reduced HCl and IF production, leading to increased gastric pH and PA, respectively (6).  
256 Achlorhydria (pH > 5.0) compromises the acid-dependent activity of DCytB, reducing Fe<sup>3+</sup> to Fe<sup>2+</sup>  
257 for DMT1-mediated iron absorption (40). Furthermore, Fe<sup>3+</sup> precipitation occurs in this less acidic  
258 environment, reducing the bioavailability of non-haem iron (which constitutes 80% of dietary iron).  
259 Haem iron absorption is similarly reduced due to impaired dissociation from dietary proteins, leading  
260 to decreased uptake via HaemT. As a result of these disruptions, less iron is transported out of  
261 enterocytes via FPN, and less ferric iron binds to transferrin for systemic circulation (41). This  
262 reduced iron availability impairs iron-dependent physiological processes such as erythropoiesis,  
263 macrophage iron recycling, and hepatic uptake, leading to systemic iron deficiency (42).

264

265 Advanced stages of AIG are thought to increase the likelihood of ID (43). However, Lagarde et al.  
266 found no differences in fundic atrophic damage in two groups of PA patients, either presenting low  
267 or adequate serum ferritin levels (19). A limitation of that study is that PCA measurements were not  
268 conducted. Similarly, Roguez et al. observed comparable levels of atrophic gastritis in individuals  
269 with PA and ID compared with those with PA or ID alone (11). Importantly, quantification of PCA  
270 concentration showed significantly higher concentrations of PCA among the PA+ID group compared  
271 with the PA-only group. Both studies included predominantly female patients under the age of 50  
272 years, suggesting a certain degree of ID could have been attributed to menstrual blood loss rather than  
273 impaired duodenal absorption (44).

274 Further supporting the hypothesis that PA may be the preceding causal factor for ID can be extracted  
275 from studies investigating gastric juice therapy. Cook et al. demonstrated that whole gastric juice  
276 therapy, including both hydrochloric and ascorbic acid, restored a normal acidic environment (pH<  
277 3.0), which is essential for preventing Fe<sup>3+</sup> precipitation and enhancing iron absorption capacity (45).  
278 In the cohort of patients with achlorhydria, iron absorption increased more than twofold when gastric  
279 juice was administered (50.6%) compared to without it (21.8%). However, the lack of quantification  
280 to examine possible improvements in iron biomarkers presents a limitation of this study. More  
281 recently, Roguez et al. found that oral haem Fe<sup>2+</sup> supplementation failed to increase serum ferritin  
282 concentration, in a small sample of PA patients with ID (n=28) (11). These results challenge the  
283 expectation and our understanding that haem Fe<sup>2+</sup> form (ferrous sulfate and ferrous fumarate) is  
284 soluble in alkaline PH, does not require chelation for enterocytic uptake (46). The small sample size,  
285 with 11 out of the total 28 participants receiving oral ferrous supplementation, may explain this  
286 discrepancy, or it could relate to the uncommon presentation of a refractory response to iron  
287 supplementation (47).

288 Another crucial and yet overlooked micronutrient that may be playing a significant role in the iron  
289 deficiency observed among PA patients is vitamin C, an essential nutrient that must be obtained

290 through dietary intake (48). Vitamin C is important for promoting iron absorption as it facilitates the  
291 conversion of dietary ferric iron ( $\text{Fe}^{3+}$ ) into the ferrous form ( $\text{Fe}^{2+}$ ) (49). A reduction in gastric acidity,  
292 which would be typically observed in PA, can also impair the secretion and concentration of vitamin  
293 C in the gastric juice, potentially due to a combination of reduced bioavailability, hypochloridria, and  
294 increased demand caused by its active secretion into the gastric juice.

295 The prevalence of vitamin C deficiency or insufficiency among PA patients is unknown although it is  
296 estimated to affect around 1.4% (2.2% of males and 0.8% of females) of the general UK population  
297 and up to 14% of the elderly (50,51). In PA patients, the loss of this micronutrient could exacerbate  
298 the already reduced iron absorption due to low gastric acid levels. Therefore, secondary vitamin C  
299 deficiency could impact iron bioavailability, and contribute to the high prevalence of iron deficiency  
300 seen at stages before, at, or after PA diagnosis.

### 301 ***Can micro and macrocytosis explain an indirect relationship between PA and ID?***

302 A common feature encountered in the literature when investigating PA and ID patients is the  
303 complexity of the type of anaemia present (11,12,14,19,30). Observations that PA patients with ID  
304 (with or without anaemia), presenting with microcytosis and/or macrocytosis have been widely  
305 reported in the published literature. Further research is needed to dissect the mechanisms linking  
306 micro and macrocytic anaemia, and PA mediated by erythropoiesis among PA patients with or without  
307 ID. It has been suggested that ID may be a result of menstrual blood loss and intestinal malabsorption  
308 playing a less important role (11,19). However, it is likely that a combination of factors, including  
309 menstrual blood loss, intestinal malabsorption, baseline iron status before AAG development and  
310 dietary iron intake, would contribute to ID development (47,52). These underlying factors could  
311 impact the rate and severity of ID development among PA patients.

312 Finally, the commencement or regimen of  $\text{B}_{12}$  therapy can also affect the development of iron  
313 deficiency and/or microcytic anaemia. Under this scenario ID and microcytosis manifest as a direct  
314 consequence of  $\text{B}_{12}$  therapy independently of a disease process. Based on this observation, we  
315 hypothesise that patients using more frequent  $\text{B}_{12}$  injections – as commonly observed – will exhibit a

316 shift from B<sub>12</sub> deficiency and/or macrocytosis to iron deficiency and/or microcytosis, due to an  
317 increased demand for iron, following increased erythropoiesis, and therefore requiring regular iron  
318 therapy (30,31). So far, researchers have directly attributed the development of ID among PA or AAG  
319 subject patients to the autoimmune-mediated attack causing the atrophic degradation of the oxyntic  
320 mucosal glands and PCs (6). Consequently, the important question of what specific PA or AAG-driven  
321 mechanism(s) cause ID remains unclear and continues to impact effective patient management  
322 (11,14,18).

### 323 *Strengths and Limitations*

324 Strengths of our study include using a novel two-sample MR design, which, under certain  
325 assumptions, allow us to test for the first time whether there is a causal relationship between ID and  
326 PA, which is unaffected by confounding factors that would normally provide an Achilles heel in  
327 traditional observational studies. We used two independent datasets, each composed of a large sample  
328 of well-defined PA cases. However, our study has some limitations which warrant further discussion.  
329 First, our data and results are limited to individuals of European descent, restricting direct  
330 extrapolation of results to other ethnic groups, particularly those at elevated risk of ID. Secondly, the  
331 genetic instrument selection was a challenge, and in this study, instruments were chosen based on  
332 their association with all four iron status markers. While the use of four independent instruments with  
333 a clear mechanism related to iron status overcomes part of this limitation, incorporating more SNPs  
334 which capture different aetiological aspects of iron status would be a more powerful and robust  
335 approach. Despite statistical methods, including the  $F$ -statistic or Egger intercept suggesting a null  
336 presence of directional pleiotropy, the possibility of residual horizontal pleiotropic effects could have  
337 occurred. More specifically, the value for heterogeneity ( $I^2$ ) in the Egger regression analysis exceeded  
338 50%, suggesting that results should be interpreted with moderate caution. Lastly, reliance on the ICD-  
339 10 coding for PA, which is used liberally by clinicians, is highly problematic, and could have led to  
340 misclassification of PA; i.e. individuals being wrongly labelled as having PA or not having PA. It is

341 highly likely that true PA (D51.0) is under-diagnosed/reported whilst “anaemia” is over-diagnosed  
342 given that all 5 ICD-10 codings for B<sub>12</sub> deficiency are labelled with anaemia.

### 343 ***Future Work***

344 A logical next step would be to conduct a bidirectional MR study to assess whether genetic variants  
345 associated with a higher susceptibility to PA are causally associated with lower iron status, using a  
346 novel set of PA-specific instruments. Such findings could strengthen results from observational  
347 studies linking PCA-driven reductions in gastric acidity, impairing the intestinal absorption of iron.  
348 Additionally, future research with a broader selection of ID-specific instruments should be conducted,  
349 placing the focus on ID rather than solely iron status *per se*. Further research is also needed to explore  
350 the role of B<sub>12</sub> therapy on erythropoiesis and ID and test whether those using more frequent B<sub>12</sub>  
351 injections exhibit higher rates of ID and/or microcytic anaemia.

352 Finally, future studies should also investigate the potential role of vitamin C as a mediator in this  
353 mechanism. An MR study assessing whether vitamin C deficiency is causal for PA and/or whether  
354 PA leads to vitamin C deficiency could provide important insights into this clinical picture. If vitamin  
355 C deficiency is found to be a key driver of impaired iron absorption in these patients, targeted  
356 interventions such as vitamin C supplementation could become part of clinical care. Clinical trials  
357 could also be used to assess whether vitamin C supplementation improves iron absorption in PA  
358 patients. Including vitamin C status in PA screening, particularly in patients with iron deficiency, may  
359 be beneficial. In all cases, the overarching goal would be to improve the management of PA patients  
360 through targeted treatment of ID.

361

### 362 **Conclusion**

363 This study suggests that among individuals of European descent iron status is not an important driver  
364 of elevated risk of PA. However, bidirectional MR studies are important to investigate whether PA  
365 could be the underlying cause of ID. Whether ID and PA are subject to either a causal or consequential  
366 relationship should be ideally confirmed through clinical trials, with a goal of improving patient



367 management to accomplish a universal precision medicine approach. This study lays the groundwork  
368 for further research that could improve clinical guidelines aimed at improving care for PA patients.

369

370

371

372

373

374

375

376

377

378

379

380

381

382

383

384

385

386

387

388

389

390

391

## 392 **References**

- 393 1. Rustgi SD, Bijlani P, Shah SC. Autoimmune gastritis, with or without pernicious anemia:  
394 epidemiology, risk factors, and clinical management. *Therap Adv Gastroenterol*. 2021 Jan  
395 31;14:175628482110387.
- 396 2. Toh BH, van Driel IR, Gleeson PA. Pernicious Anemia. *New England Journal of Medicine*.  
397 1997 Nov 13;337(20):1441–8.
- 398 3. Andres E, Serraj. Optimal management of pernicious anemia. *J Blood Med*. 2012 Sep;97.
- 399 4. Esposito G, Dottori L, Pivetta G, Ligato I, Dilaghi E, Lahner E. Pernicious Anemia: The  
400 Hematological Presentation of a Multifaceted Disorder Caused by Cobalamin Deficiency.  
401 *Nutrients*. 2022 Apr 17;14(8):1672.
- 402 5. Lahner E, Marzinotto I, Lampasona V, Dottori L, Bazzigaluppi E, Brigatti C, et al.  
403 Autoantibodies Toward ATP4A and ATP4B Subunits of Gastric Proton Pump H<sup>+</sup>,K<sup>+</sup>-ATPase  
404 Are Reliable Serological Pre-endoscopic Markers of Corpus Atrophic Gastritis. *Clin Transl*  
405 *Gastroenterol*. 2020 Oct;11(10):e00240.
- 406 6. Lenti MV, Rugge M, Lahner E, Miceli E, Toh BH, Genta RM, et al. Autoimmune gastritis.  
407 *Nat Rev Dis Primers*. 2020 Jul 9;6(1):56.
- 408 7. Banka S, Ryan K, Thomson W, Newman WG. Pernicious anemia – Genetic insights.  
409 *Autoimmun Rev*. 2011 Jun;10(8):455–9.
- 410 8. Miller JL. Iron Deficiency Anemia: A Common and Curable Disease. *Cold Spring Harb*  
411 *Perspect Med*. 2013 Jul 1;3(7):a011866–a011866.
- 412 9. Pasricha SR, Tye-Din J, Muckenthaler MU, Swinkels DW. Iron deficiency. *The Lancet*. 2021  
413 Jan;397(10270):233–48.
- 414 10. Demiroğlu H, Dündar S. Pernicious anaemia patients should be screened for iron deficiency  
415 during follow up. *N Z Med J*. 1997 Apr 25;110(1042):147–8.

- 416 11. Rogez J, Urbanski G, Vinatier E, Lavigne C, Emmanuel L, Dupin I, et al. Iron deficiency in  
417 pernicious anemia: Specific features of iron deficient patients and preliminary data on  
418 response to iron supplementation. *Clinical Nutrition*. 2024 Apr;43(4):1025–32.
- 419 12. Carmel R. Iron Deficiency Occurs Frequently in Patients With Pernicious Anemia. *JAMA:*  
420 *The Journal of the American Medical Association*. 1987 Feb 27;257(8):1081.
- 421 13. Hershko C, Ronson A, Souroujon M, Maschler I, Heyd J, Patz J. Variable hematologic  
422 presentation of autoimmune gastritis: age-related progression from iron deficiency to  
423 cobalamin depletion. *Blood*. 2006 Feb 15;107(4):1673–9.
- 424 14. Zulfikar AA, Dramé M, Pennaforte JL, Novella JL, Vogel T, Andres E. Iron deficiency and  
425 pernicious anemia: a rare association? *Ann Biol Clin (Paris)*. 2015 Jul;73(4):420–6.
- 426 15. Gibson IJM, Kelly AM, Wang I. The Iron Deficiency of Pernicious Anaemia. *Scott Med J*.  
427 1963 Sep 25;8(9):357–64.
- 428 16. Htut TW, Thein KZ, Oo TH. Pernicious anemia: Pathophysiology and diagnostic difficulties.  
429 *J Evid Based Med*. 2021 May 20;14(2):161–9.
- 430 17. Hooper M, Hudson P, Porter F, McCaddon A. Patient journeys: diagnosis and treatment of  
431 pernicious anaemia. *British Journal of Nursing*. 2014 Apr 10;23(7):376–81.
- 432 18. Atrah HI, Davidson RJJ. Iron deficiency in pernicious anaemia: a neglected diagnosis.  
433 *Postgrad Med J*. 1988 Feb 1;64(748):110–1.
- 434 19. Lagarde S, Jovenin N, Diebold MD, Jaussaud R, Cahn V, Bertin E, et al. Is there any  
435 relationship between pernicious anemia and iron deficiency ? *Gastroenterol Clin Biol*. 2006  
436 Nov;30(11):1245–9.
- 437 20. Davies NM, Holmes M V, Davey Smith G. Reading Mendelian randomisation studies: a  
438 guide, glossary, and checklist for clinicians. *BMJ*. 2018 Jul 12;k601.
- 439 21. Bell S, Rigas AS, Magnusson MK, Ferkingstad E, Allara E, Bjornsdottir G, et al. A genome-  
440 wide meta-analysis yields 46 new loci associating with biomarkers of iron homeostasis.  
441 *Commun Biol*. 2021 Feb 3;4(1):156.

- 442 22. Hujoel IA, Hujoel MLA. Investigating the role of iron status in the development of coeliac  
443 disease: a Mendelian randomisation study. *BMJ Open Gastroenterol.* 2024  
444 Jan;11(1):e001236.
- 445 23. Finngen. Vitamin B12 deficiency anaemia.
- 446 24. Laisk T, Lepamets M, Koel M, Abner E, Metspalu A, Nelis M, et al. Genome-wide  
447 association study identifies five risk loci for pernicious anemia. *Nat Commun.* 2021 Jun  
448 18;12(1):3761.
- 449 25. Machiela MJ, Chanock SJ. LDlink: a web-based application for exploring population-  
450 specific haplotype structure and linking correlated alleles of possible functional variants.  
451 *Bioinformatics.* 2015 Nov 1;31(21):3555–7.
- 452 26. Bowden J, Davey Smith G, Haycock PC, Burgess S. Consistent Estimation in Mendelian  
453 Randomization with Some Invalid Instruments Using a Weighted Median Estimator. *Genet  
454 Epidemiol.* 2016 May 7;40(4):304–14.
- 455 27. Bowden J, Davey Smith G, Burgess S. Mendelian randomization with invalid instruments:  
456 effect estimation and bias detection through Egger regression. *Int J Epidemiol.* 2015 Apr  
457 1;44(2):512–25.
- 458 28. Bowden J, Del Greco M F, Minelli C, Zhao Q, Lawlor DA, Sheehan NA, et al. Improving the  
459 accuracy of two-sample summary-data Mendelian randomization: moving beyond the  
460 NOME assumption. *Int J Epidemiol.* 2019 Jun 1;48(3):728–42.
- 461 29. Bowden J, Del Greco M F, Minelli C, Davey Smith G, Sheehan N, Thompson J. A  
462 framework for the investigation of pleiotropy in two-sample summary data Mendelian  
463 randomization. *Stat Med.* 2017 May 20;36(11):1783–802.
- 464 30. Solmaz S, Özdoğu H, Boğa C. Cobalamin Deficiency Can Mask Depleted Body Iron  
465 Reserves. *Indian Journal of Hematology and Blood Transfusion.* 2015 Jun 14;31(2):255–8.
- 466 31. HILLMAN RS, ADAMSON J, BURKA E. Characteristics of Vitamin B12 Correction of The  
467 Abnormal Erythropoiesis of Pernicious Anemia. *Blood.* 1968 Apr 1;31(4):419–32.

- 468 32. Annibale B, Lahner E, Fave GD. Diagnosis and Management of Pernicious Anemia. *Curr*  
469 *Gastroenterol Rep.* 2011 Dec 21;13(6):518–24.
- 470 33. Lahner E, Annibale B. Pernicious anemia: New insights from a gastroenterological point of  
471 view. *World J Gastroenterol.* 2009;15(41):5121.
- 472 34. Quigley EMM, Turnberg LA. pH of the microclimate lining human gastric and duodenal  
473 mucosa in vivo. *Gastroenterology.* 1987 Jun;92(6):1876–84.
- 474 35. McKie AT, Barrow D, Latunde-Dada GO, Rolfs A, Sager G, Mudaly E, et al. An Iron-  
475 Regulated Ferric Reductase Associated with the Absorption of Dietary Iron. *Science* (1979).  
476 2001 Mar 2;291(5509):1755–9.
- 477 36. Mackenzie B, Garrick MD. Iron Imports. II. Iron uptake at the apical membrane in the  
478 intestine. *American Journal of Physiology-Gastrointestinal and Liver Physiology.* 2005  
479 Dec;289(6):G981–6.
- 480 37. Shayeghi M, Latunde-Dada GO, Oakhill JS, Laftah AH, Takeuchi K, Halliday N, et al.  
481 Identification of an Intestinal Heme Transporter. *Cell.* 2005 Sep;122(5):789–801.
- 482 38. Chen H. Hephaestin is a ferroxidase that maintains partial activity in sex-linked anemia mice.  
483 *Blood.* 2004 May 15;103(10):3933–9.
- 484 39. McKie AT, Marciani P, Rolfs A, Brennan K, Wehr K, Barrow D, et al. A Novel Duodenal  
485 Iron-Regulated Transporter, IREG1, Implicated in the Basolateral Transfer of Iron to the  
486 Circulation. *Mol Cell.* 2000 Feb;5(2):299–309.
- 487 40. Annibale B, Capurso G, Delle Fave G. The stomach and iron deficiency anaemia: a forgotten  
488 link. *Digestive and Liver Disease.* 2003 Apr;35(4):288–95.
- 489 41. Piskin E, Cianciosi D, Gulec S, Tomas M, Capanoglu E. Iron Absorption: Factors,  
490 Limitations, and Improvement Methods. *ACS Omega.* 2022 Jun 21;7(24):20441–56.
- 491 42. Pasricha SR, Tye-Din J, Muckenthaler MU, Swinkels DW. Iron deficiency. *The Lancet.* 2021  
492 Jan;397(10270):233–48.

- 493 43. Coati I. Autoimmune gastritis: Pathologist's viewpoint. *World J Gastroenterol.*  
494 2015;21(42):12179.
- 495 44. Harvey LJ, Armah CN, Dainty JR, Foxall RJ, Lewis DJ, Langford NJ, et al. Impact of  
496 menstrual blood loss and diet on iron deficiency among women in the UK. *British Journal of*  
497 *Nutrition.* 2005 Oct 8;94(4):557–64.
- 498 45. Cook JD, Brown GM, Valberg LS. The Effect of Achylia Gastrica on Iron Absorption\*.  
499 *Journal of Clinical Investigation.* 1964 Jun 1;43(6):1185–91.
- 500 46. Conrad ME, Umbreit JN. Iron absorption and transport?An update. *Am J Hematol.* 2000  
501 Aug;64(4):287–98.
- 502 47. Warsch S, Byrnes J. Emerging causes of iron deficiency anemia refractory to oral iron  
503 supplementation. *World J Gastrointest Pharmacol Ther.* 2013;4(3):49.
- 504 48. Lombard M, Chua E, O'Toole P. Regulation of intestinal non-haem iron absorption. *Gut.*  
505 1997 Apr;40(4):435–9.
- 506 49. Bothwell TH, Baynes RD, Macfarlane BJ, Macphail AP. Nutritional iron requirements and  
507 food iron absorption. *J Intern Med.* 1989 Nov 19;226(5):357–65.
- 508 50. Bates CJ, Prentice A, Cole TJ, van der Pols JC, Doyle W, Finch S, et al. Micronutrients:  
509 highlights and research challenges from the 1994–5 National Diet and Nutrition Survey of  
510 people aged 65 years and over. *British Journal of Nutrition.* 1999 Jul 9;82(1):7–15.
- 511 51. Canoy D, Wareham N, Welch A, Bingham S, Luben R, Day N, et al. Plasma ascorbic acid  
512 concentrations and fat distribution in 19 068 British men and women in the European  
513 Prospective Investigation into Cancer and Nutrition Norfolk cohort study. *Am J Clin Nutr.*  
514 2005 Dec;82(6):1203–9.
- 515 52. Cavalcoli F, Zilli A, Conte D, Massironi S. Micronutrient deficiencies in patients with  
516 chronic atrophic autoimmune gastritis: A review. *World J Gastroenterol.* 2017;23(4):563.
- 517  
518

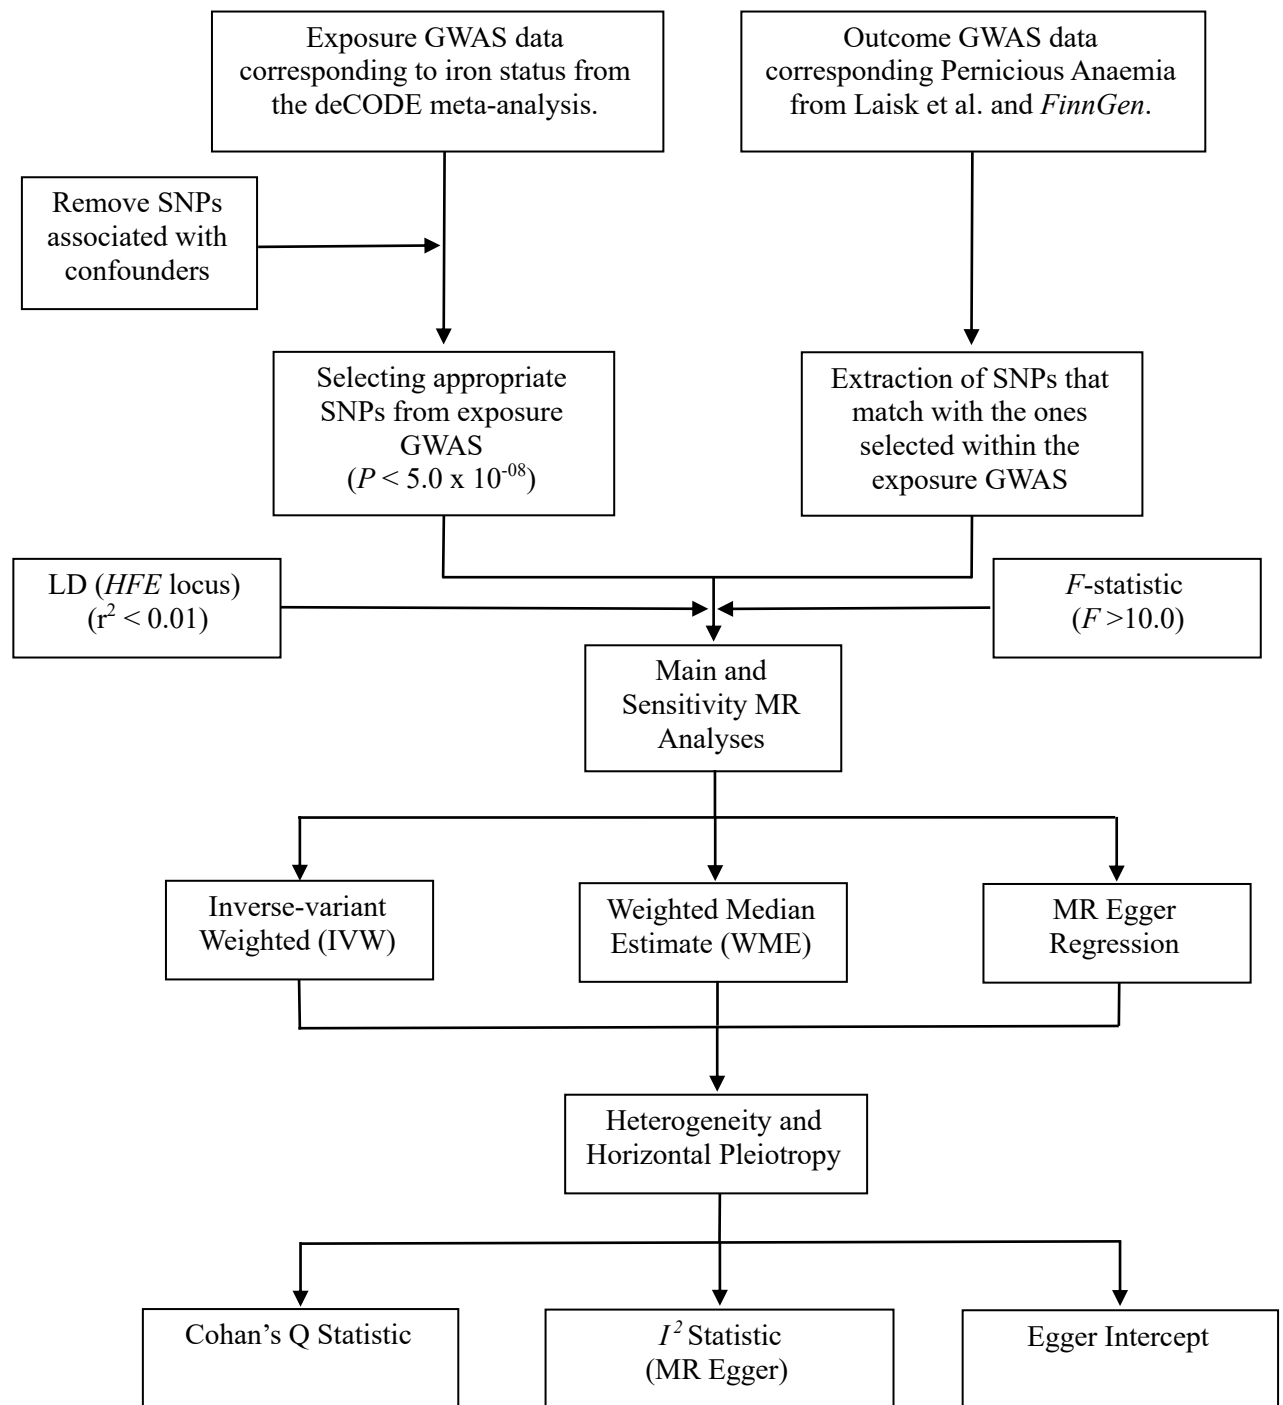

**Figure 1.** Flowchart outlining MR study protocol and study design between systemic iron status and PA. LD Coefficient =  $r^2$ .

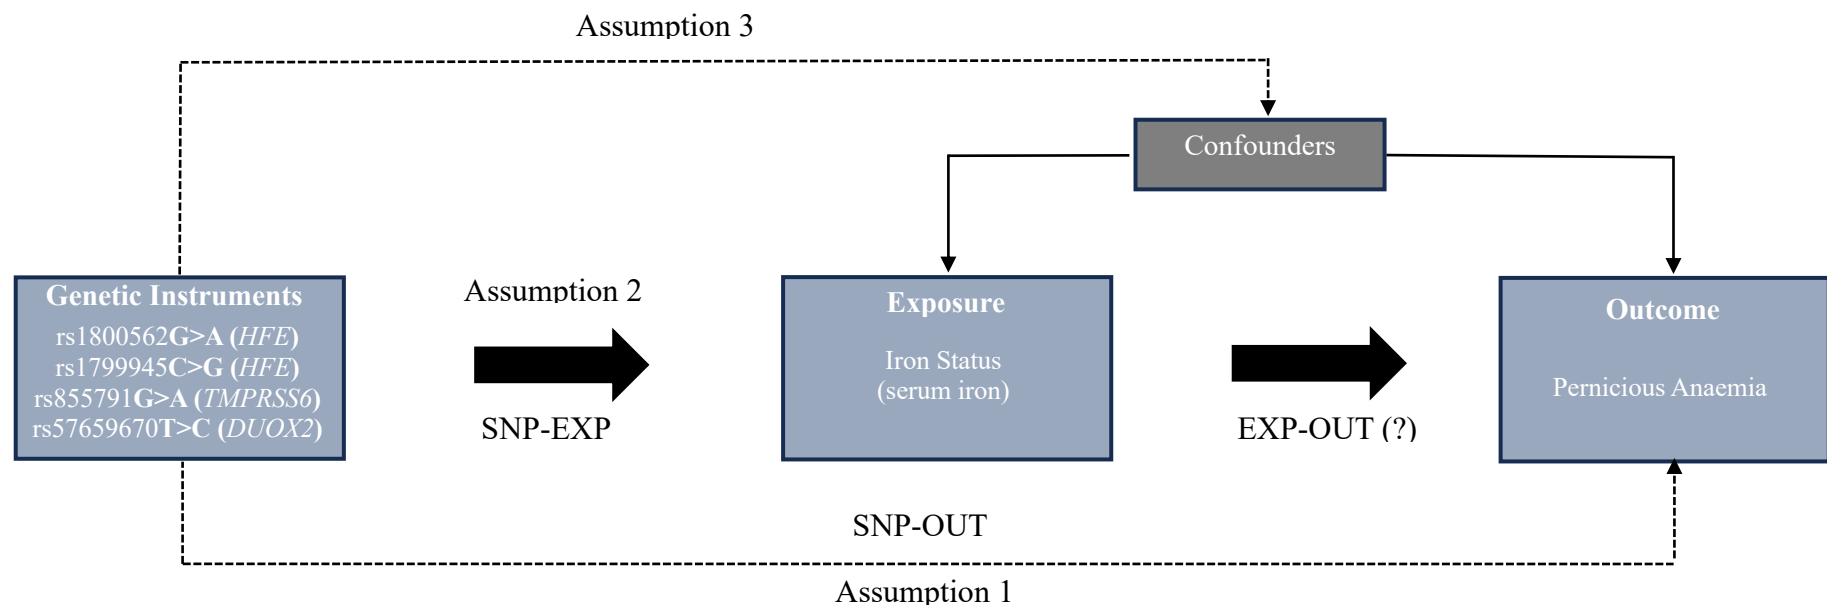

**Figure 2. Mendelian Randomisation:** Assumption 1 (Independence assumption), Assumption 2 (Relevance assumption), Assumption 3 (Exclusion restriction). SNP-Exposure association (SNP-EXP), SNP-outcome association (SNP-OUT), Exposure-Outcome association (EXP-OUT).



**Table 1.** Characteristics of selected SNPs and associations with serum iron status and Pernicious Anaemia.

| SNP        | Effect:Null | EAF    | <i>F</i> -statistic | LD    | Exposure (Serum Iron) |        |                           | Outcome (Pernicious Anaemia) |          |       |                 |
|------------|-------------|--------|---------------------|-------|-----------------------|--------|---------------------------|------------------------------|----------|-------|-----------------|
|            |             |        |                     |       | Beta                  | SE     | <i>P</i> -value           | EAF                          | Beta     | SE    | <i>P</i> -value |
| rs1799945  | G : C       | 0.137  | 853.20              | 0.006 | 0.17                  | 0.0058 | 1.26 x 10 <sup>-187</sup> | 0.141                        | 0.032237 | 0.046 | 0.481483        |
| rs1800562  | A : G       | 0.0677 | 1262.12             | 0.006 | 0.27                  | 0.0076 | 1.00 x 10 <sup>-200</sup> | 0.0611                       | -0.01981 | 0.069 | 0.774113        |
| rs57659670 | C : T       | 0.0753 | 32.65               | --    | -0.042                | 0.0074 | 1.08 x 10 <sup>-08</sup>  | 0.0763                       | 0.01339  | 0.059 | 0.819947        |
| rs855791   | A : G       | 0.431  | 1371.74             | --    | -0.17                 | 0.0046 | 1.00 x 10 <sup>-200</sup> | 0.418                        | 0.10113  | 0.032 | 0.001450        |

**Note:** Effect Allele:Null Allele, Effect Allele Frequency (EAF), Beta = effect size, Standard Error (SE), SNP-exposure significance was set at  $P < 5.0 \times 10^{-08}$ . The effect allele refers to the recessive allele within such gene, hence indicating that the wild-type allele refers to the null variant. LD Coefficient =  $r^2$ ,  $F > 10.0$  = strong genetic instrument,  $F < 10.0$  = subject to weak instrument bias. LD was calculated and extracted making use of the LDLink tool. The summary statistical data set refers to the R10 *FinnGen* release.

**Table 2.** MR estimates for the causal association between serum iron status and PA using the *FinnGen* [37] data set.

| MR Method | OR   | CI          | P-value  | Cochran Q | Cochran Q P-value | MR Egger          |                    |
|-----------|------|-------------|----------|-----------|-------------------|-------------------|--------------------|
|           |      |             |          |           |                   | Intercept P-value | I <sup>2</sup> (%) |
| IVW       | 1.13 | 1.58 ± 0.80 | 0.492311 | 6.54      | 0.051542          |                   |                    |
| MR Egger  | 1.04 | 3.59 ± 0.30 | 0.952501 |           |                   | 0.910154          | 61.27              |
| WME       | 1.14 | 1.48 ± 0.88 | 0.318990 |           |                   |                   |                    |

**Note:** Odds Ratio (OR), 95% Confidence Interval (CI) – Upper Bound ± Lower Bound, Inverse Variance Weighted (IVW), Weighted Median Estimate (WME). Egger Intercept P-value was compared to the IVW method intercept of 0.

**Table 3.** Replication of MR estimates for the causal association between serum iron status and PA, using the PA GWAS data set

| MR Method | OR   | CI          | P-value  | Cochran Q | Cochran Q P-value | MR Egger          |                    |
|-----------|------|-------------|----------|-----------|-------------------|-------------------|--------------------|
|           |      |             |          |           |                   | Intercept P-value | I <sup>2</sup> (%) |
| IVW       | 0.76 | 1.12 ± 0.52 | 0.163135 | 6.54      | 0.08811           |                   |                    |
| MR Egger  | 0.90 | 3.47 ± 0.24 | 0.896621 |           |                   | 0.81811           | 54.12              |
| WME       | 0.73 | 1.05 ± 0.52 | 0.087432 |           |                   |                   |                    |

**Note:** Odds Ratio (OR), 95% Confidence Interval (CI) – Upper Bound ± Lower Bound, Inverse Variance Weighted (IVW), Weighted Median Estimate (WME).
